# Supplementary material for: Effect of Complexation with Closo-Decaborate Anion on Photophysical Properties of Copolyfluorenes Containing Dicyanophenanthrene Units in the Main Chain
Source: Preprints.org preprint supplement (doi:10.20944/preprints202310.1206.v1), 2023-10-19
Supplement: Supplementary file 3 [file supplementary]

Supporting information

Effect of Complexation with *Closo-*Decaborate Anion on Photophysical Properties of Copolyfluorenes Containing Dicyanophenanthrene Units in the Main Chain

Anton A. Yakimanskiy 1, Ksenia I. Kaskevich 1, Tatiana G. Chulkova 1, Elena L. Krasnopeeva 1,*, Serguei V. Savilov 2,3, Vera V. Voinova 3, Nikolay K. Neumolotov 3, Andrey P. Zhdanov 3, Anastasia V. Rogova 4, Felix N. Tomilin 4,5, Konstantin Yu. Zhizhin 3, and Alexander V. Yakimansky 1

|  |
| --- |

1 Institute of Macromolecular Compounds RAS, Bolshoi Prospect of Vasilyevsky Island 31, St. Petersburg, 199004, Russia; yakimanskii@gmail.com (A.A.Y.); kaskevich-ksenia@yandex.ru (K.I.K.); tgc@mail.ru (T.G.C.); yakimansky@yahoo.com (A.V.Y.)

2 Department of Chemistry, Lomonosov Moscow State University, Moscow 119991, Russia; savilov@mail.ru

3 Kurnakov Institute of General and Inorganic Chemistry RAS, Moscow, 119991, Russia; savilov@mail.ru (S.V.S); veravoinova@rx24.ru (V.V.V.); neumolotovn@gmail.com (N.K.N.); zh_dots@mail.ru (A.P.Z.); zhizhin@igic.ras.ru (K.Y.Z.)

4 Kirensky Institute of Physics, Federal Research Center KSC SB RAS, Krasnoyarsk 660036, Russia; arogova1927@gmail.com (A.V.R.); felixnt@gmail.com (F.N.T.)

5 Laboratory for Digital Controlled Drugs and Theranostics, Federal Research Center “Krasnoyarsk Science Center SB RAS”, Krasnoyarsk, 660041, Russia; felixnt@gmail.com

***** Correspondence: opeeva@gmail.com; Tel.: +7-812-3237407

**Table S1.** Molecular mass1 characteristics of copolyfluorenes.

| **CPF name** | **Comonomer loading (x), mol%** | **Mw*10-3 g/mol** | **Mn*10-3 g/mol** | **Mw/Mn** |
| --- | --- | --- | --- | --- |
| PFCN0.5 [1] | 0.5 | 32.5 | 20.9 | 1.55 |
| PFCN2.5 [1] | 2.5 | 11.5 | 9.0 | 1.3 |
| PFCN5 | 5.0 | 9.5 | 6.8 | 1.4 |

1 Weight-average molecular weight (Mw), number-average molecular weight (Mn) and molecular weight polydispersity ratio (Mw/Mn) of the samples were estimated by size exclusion chromatography (SEC). LS detector data presented.

**Table S2.** FT-IR and 1H NMR selected data for synthesized compounds.

| **name** | **FT-IR data, cm-1** | **1H NMR data, ppm** |
| --- | --- | --- |
| PFCN0.5+B | 2921, s (νas CH2) | 7.88-7.86 (m, 2H), 7.74-7.70 (m, 4H), Har fluorene |
| 2850, s (νs CH2)  2492.5, m (ν BH)  1456, s (νs C-Car) | 4.14 (q, *J* = 7.0 Hz), CH3C***H2***O- (terminal)  3.32-3.19 (m), CH3CH2CH2***CH2***N- |
| 810, s (δ CHar) | 2.4-1.8 (m, 4H) CH2 octyl  1.65 (m), CH3CH2***CH2***CH2N- |
|  | 1.54-1.44 (m), CH3***CH2***CH2CH2N-and C***H*3**CH2O- (terminal) |
|  | 1.25-1.17 (m, 20H), CH2 octyl  1.02 (m), ***CH3***CH2CH2CH2N- |
|  | 0.86-0.83 (m, 10H), CH2 and CH3 octyl |
| PFCN2.5+B | 2922, s (νas CH2) | 7.88-7.86 (m, 2H), 7.74-7.70 (m, 4H), Har fluorene |
| 2850, s (νs CH2)  2476, m (ν BH) | 4.14 (q, *J* = 7.0 Hz), CH3C***H2***O- (terminal)  3.32-3.19 (m), CH3CH2CH2***CH2***N- |
| 1458, s (νs C-Car)  810, s (δ CHar) | 2.4-1.8 (m, 4H) CH2 octyl  1.65 (m), CH3CH2***CH2***CH2N- |
|  | 1.55-1.45 (m), CH3***CH2***CH2CH2N-and C***H*3**CH2O- (terminal) |
|  | 1.25-1.17 (m, 20H), CH2 octyl  1.02 (t, *J* = 7.3 Hz), ***CH3***CH2CH2CH2N- |
|  | 0.86-0.83 (m, 10H), CH2 and CH3 octyl |
| PFCN5+B | 2923, s (νas CH2)  2851, s (νs CH2)  2492.5, m (ν BH)  1457, s (νs C-Car)  811, s (δ CHar) | 7.88-7.86 (m, 2H), 7.74-7.70 (m, 4H), Har fluorene  4.17-4.11. (m), CH3C***H2***O- (terminal)  3.32-3.19 (m), CH3CH2CH2***CH2***N-  2.4-1.8 (m, 4H) CH2 octyl  1.66 (m), CH3CH2***CH2***CH2N-  1.54-1.44 (m), CH3***CH2***CH2CH2N-and C***H*3**CH2O- (terminal)  1.25-1.16 (m, 20H), CH2 octyl  1.02 (t, *J* = 7.3 Hz), ***CH3***CH2CH2CH2N-  0.86-0.83 (m, 10H), CH2 and CH3 octyl |

**
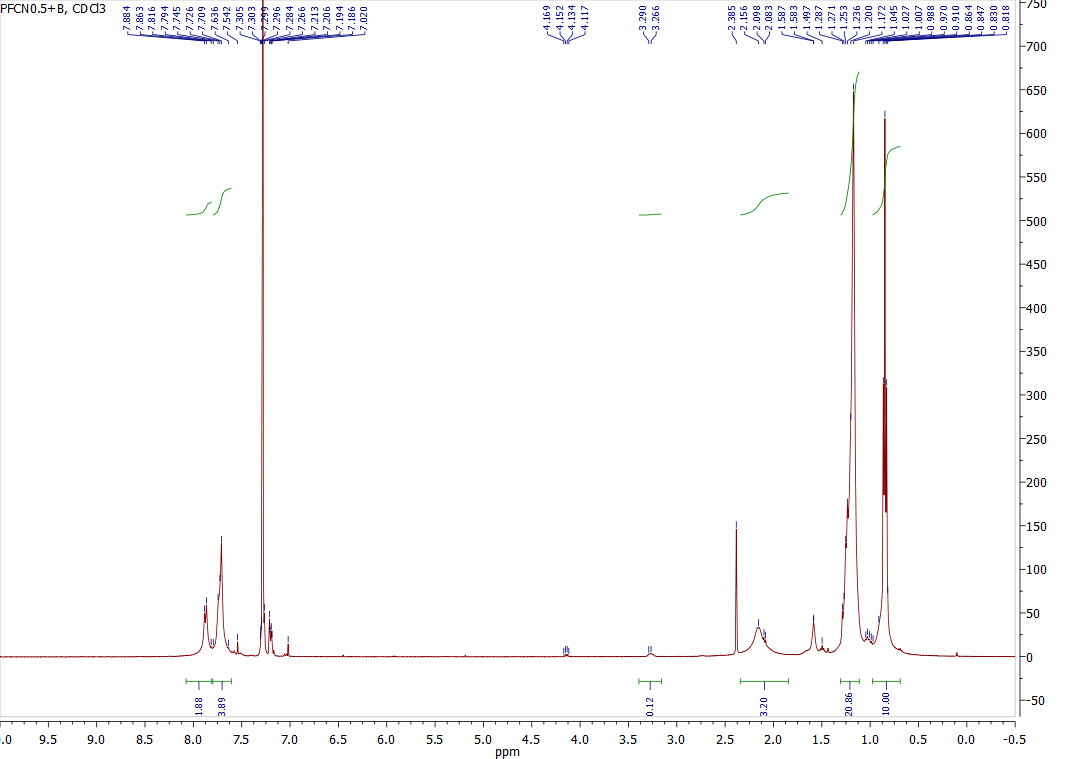

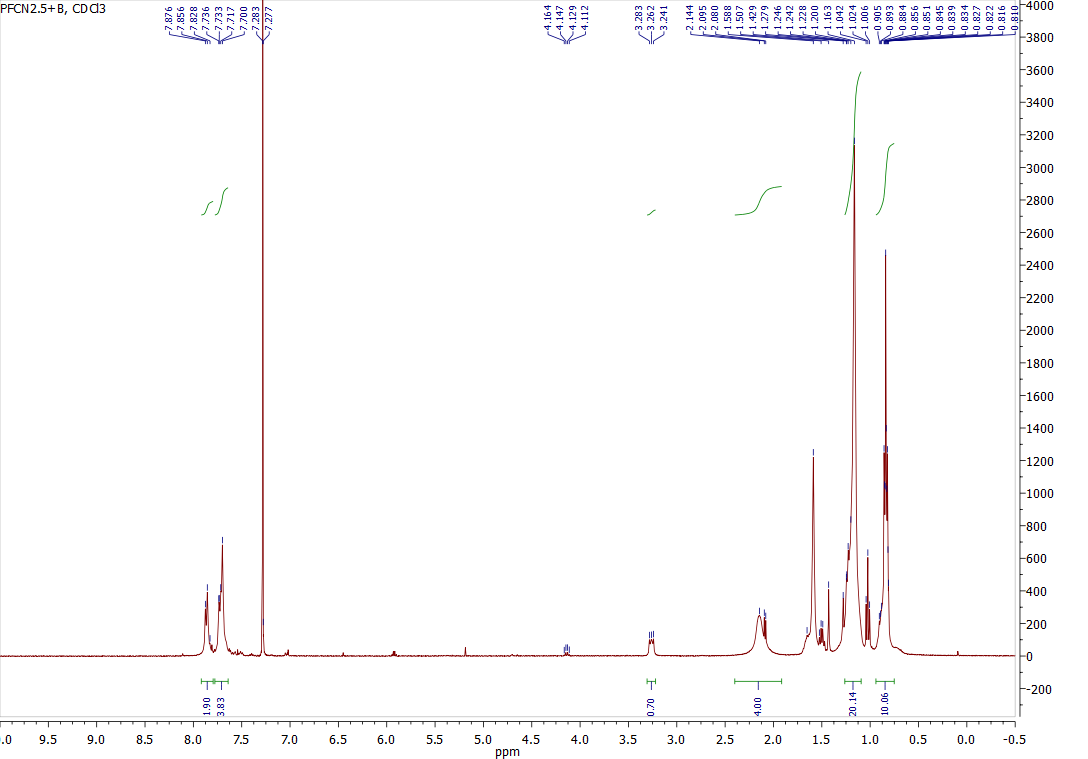

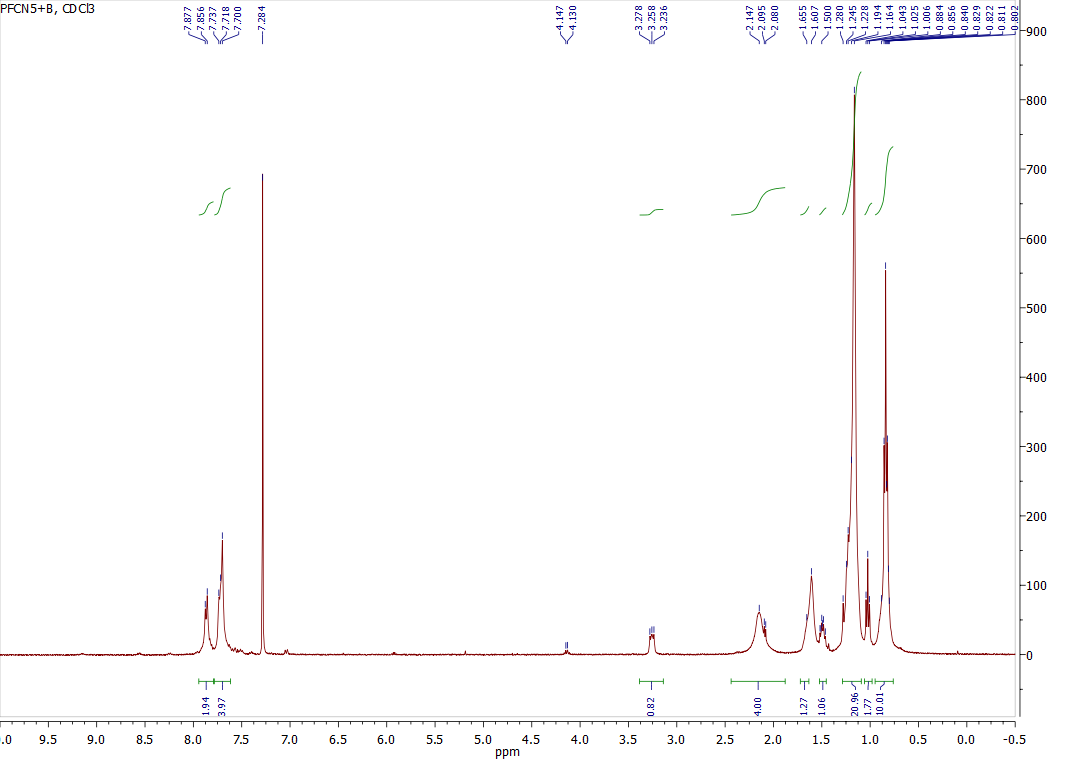
**

**Figure S1.** 1H NMR spectra of compounds (PFCN0.5+B, PFCN2.5+B, and PFCN5+B) in CDCl3.


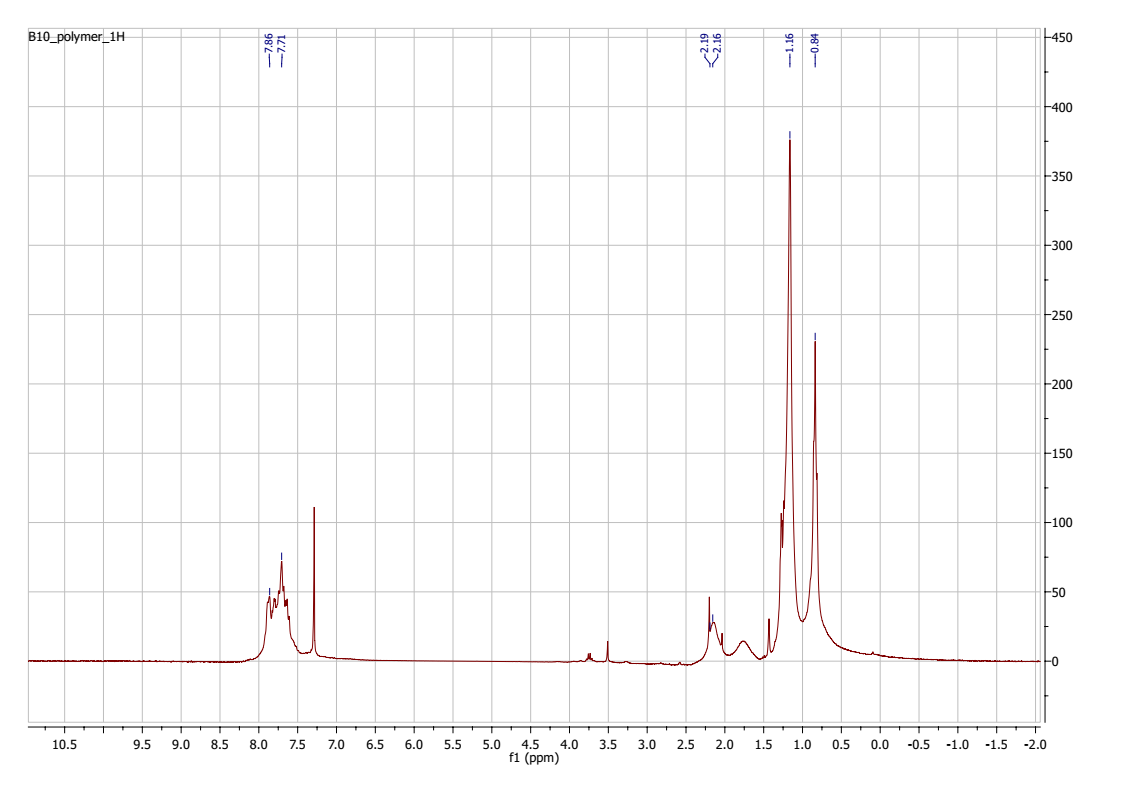
**Figure S2.** 1H NMR spectrum of PFCN2.5+B’ in CDCl3.


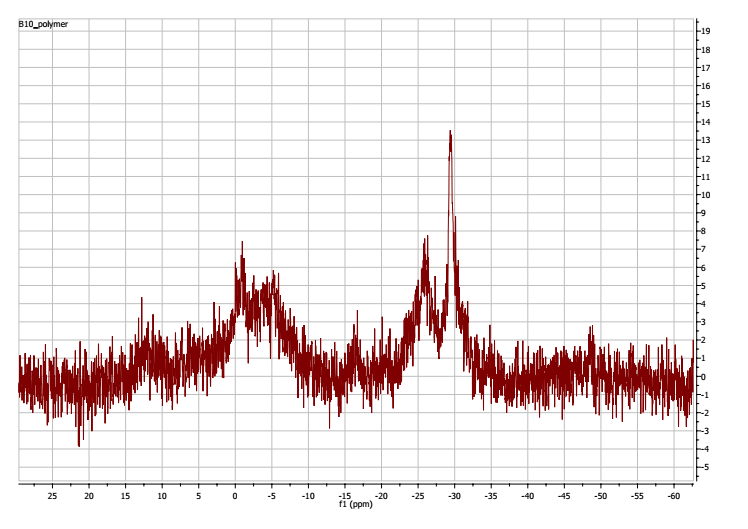


**Figure S3.** 11B{1H} NMR spectrum of PFCN2.5+B’ in CDCl3.

**Figure S4.** FT-IR spectra of PFCN2.5 (top) and PFCN2.5+B’(bottom).

**
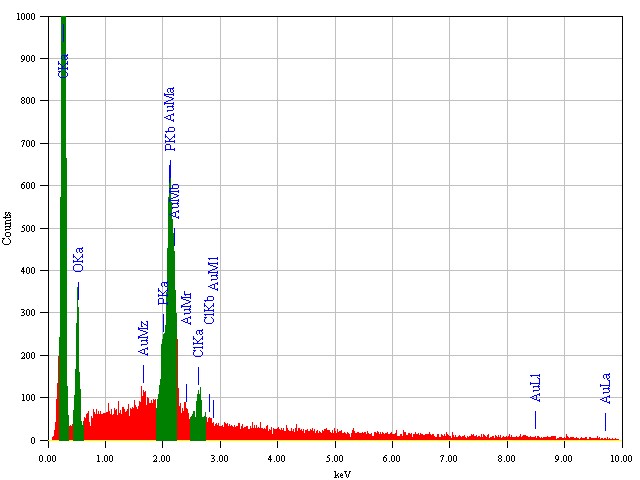
**

**Figure S5.** EDS for PFCN2.5+B’.

**Table S3.** UV-Vis and fluorescence spectral data for CPFs films.

| **CPFs** | **λabs, nm** | **λem, nm** | **Stokes shift, nm** |
| --- | --- | --- | --- |
| PFCN0.5+B | 386, 394*, 433* | 498 | 65 |
| PFCN0.5 [1] | 385, 426* | 499 | 73 |
| PFCN2.5+B | 383, 398*, 432* | 465 | 33 |
| PFCN2.5 [1] | 385, 424* | 463 | 39 |
| PFCN5+B | 383, 395* | 527 | 132 |
| PFCN5 | 383, 394* | 530 | 136 |

* Shoulder





**Figure S6.** PL spectra of PFCN2.5, PFCN2.5+B, PFCN2.5 after heating at 80°C for 4 h, and PFCN2.5+B after heating at 80°C for 4 h in films.


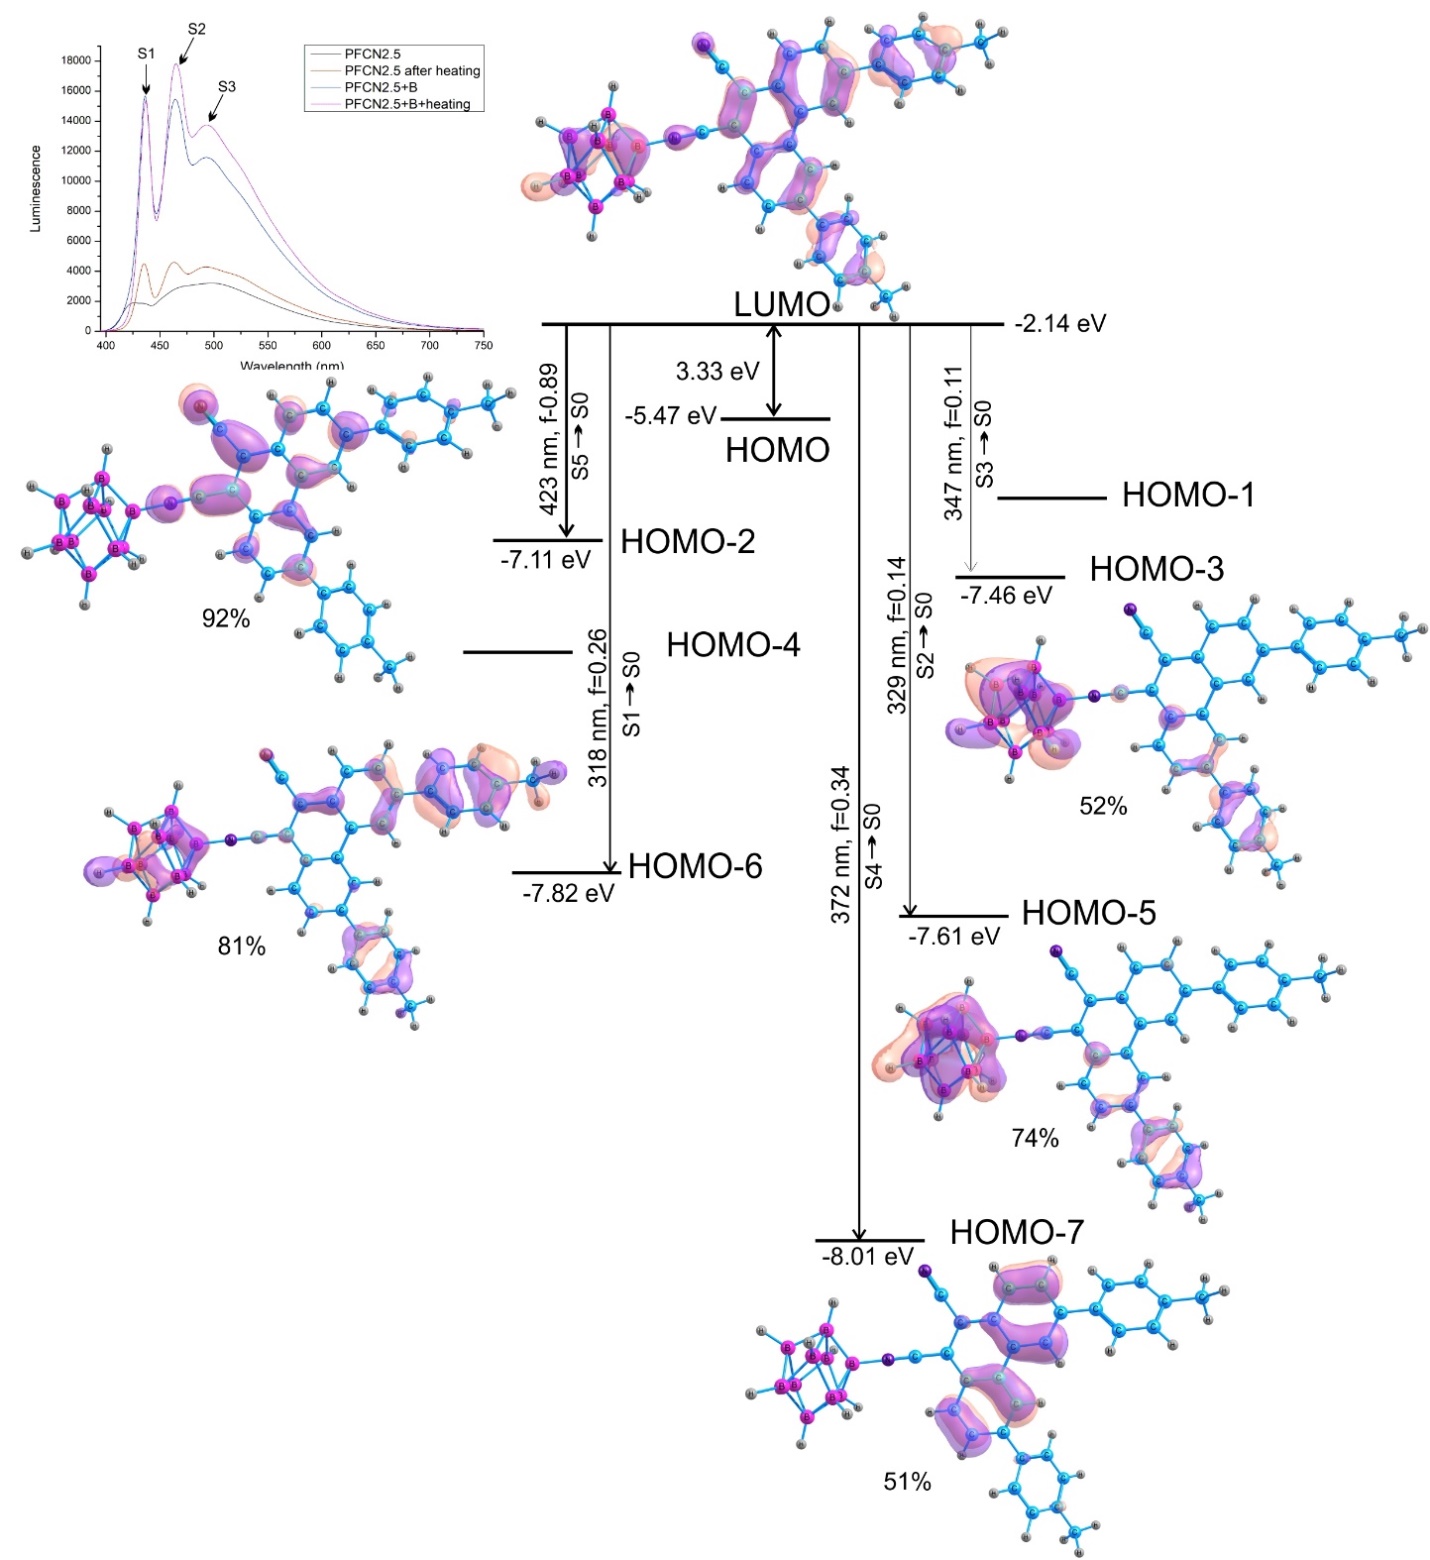


**Figure S7.** Transition scheme and molecular orbitals in the excited state of the PFCN-B1 molecule. Transition maxima in the luminescence spectrum according to Table 1. Energy of molecular orbitals in eV. The f is the oscillator strength. Maximum contributions of orbitals involved in this transition are given in percent (%). The inset shows the experimental luminescence spectrum.


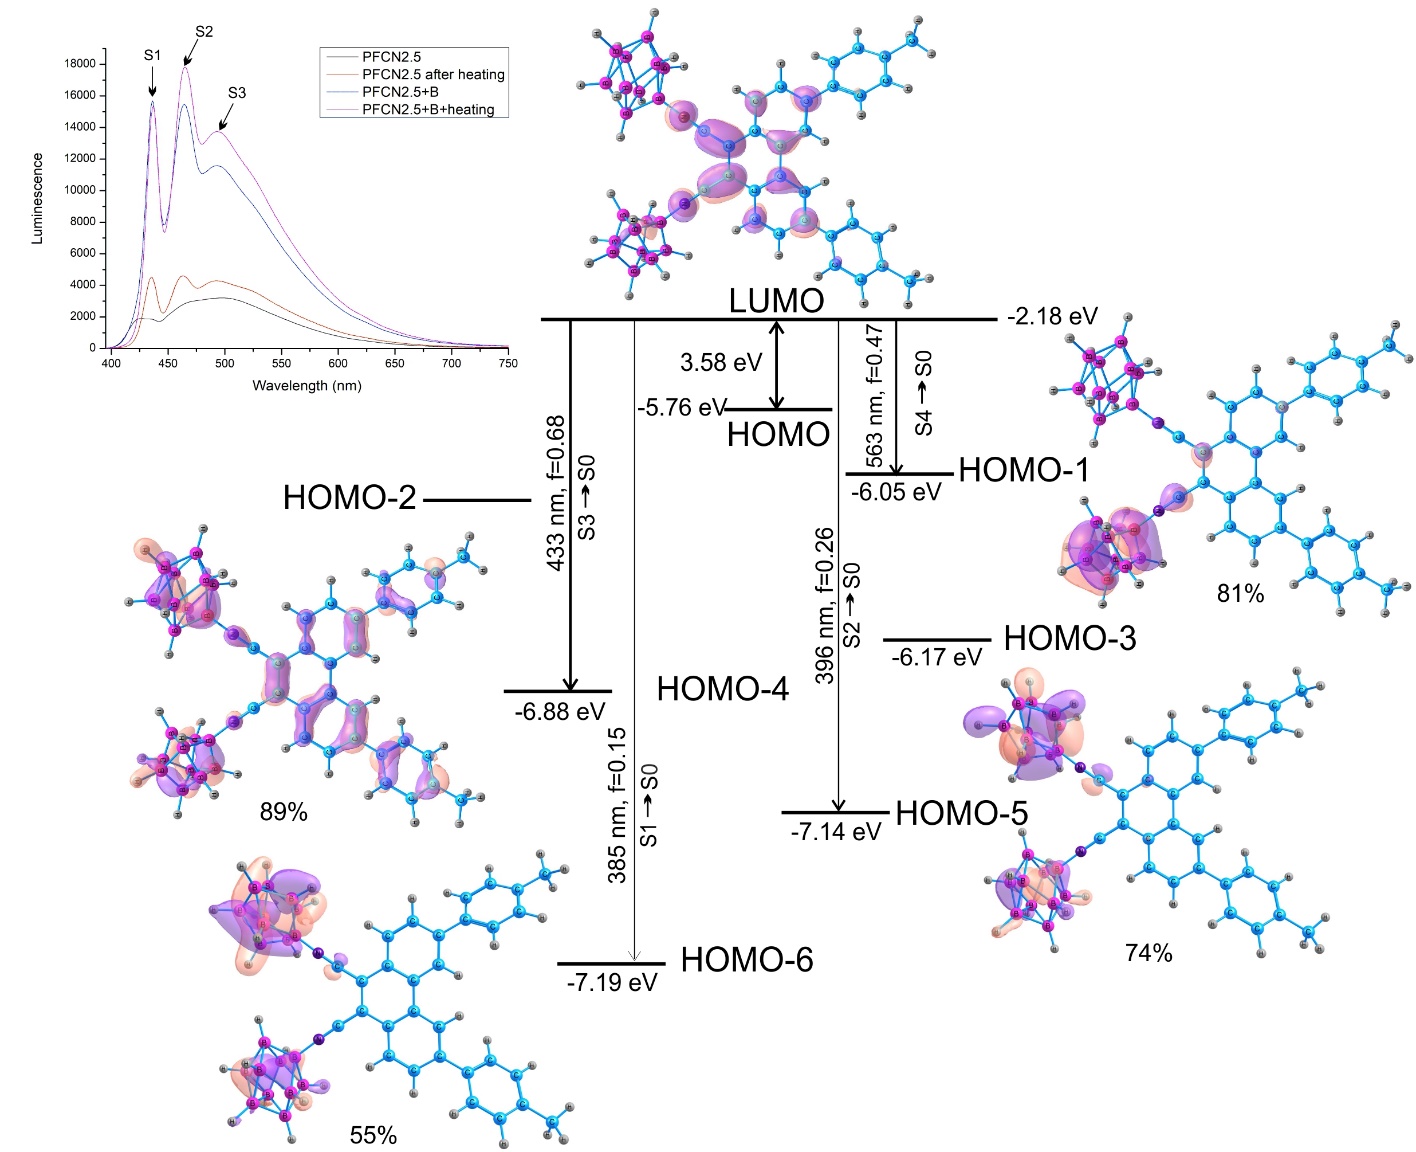


**Figure S8.** Transition scheme and molecular orbitals in the excited state of the PFCN-B2 molecule. Transition maxima in the luminescence spectrum according to Table 1. Energy of molecular orbitals in eV. The f is the oscillator strength. Maximum contributions of orbitals involved in this transition are given in percent (%). The inset shows the experimental luminescence spectrum.


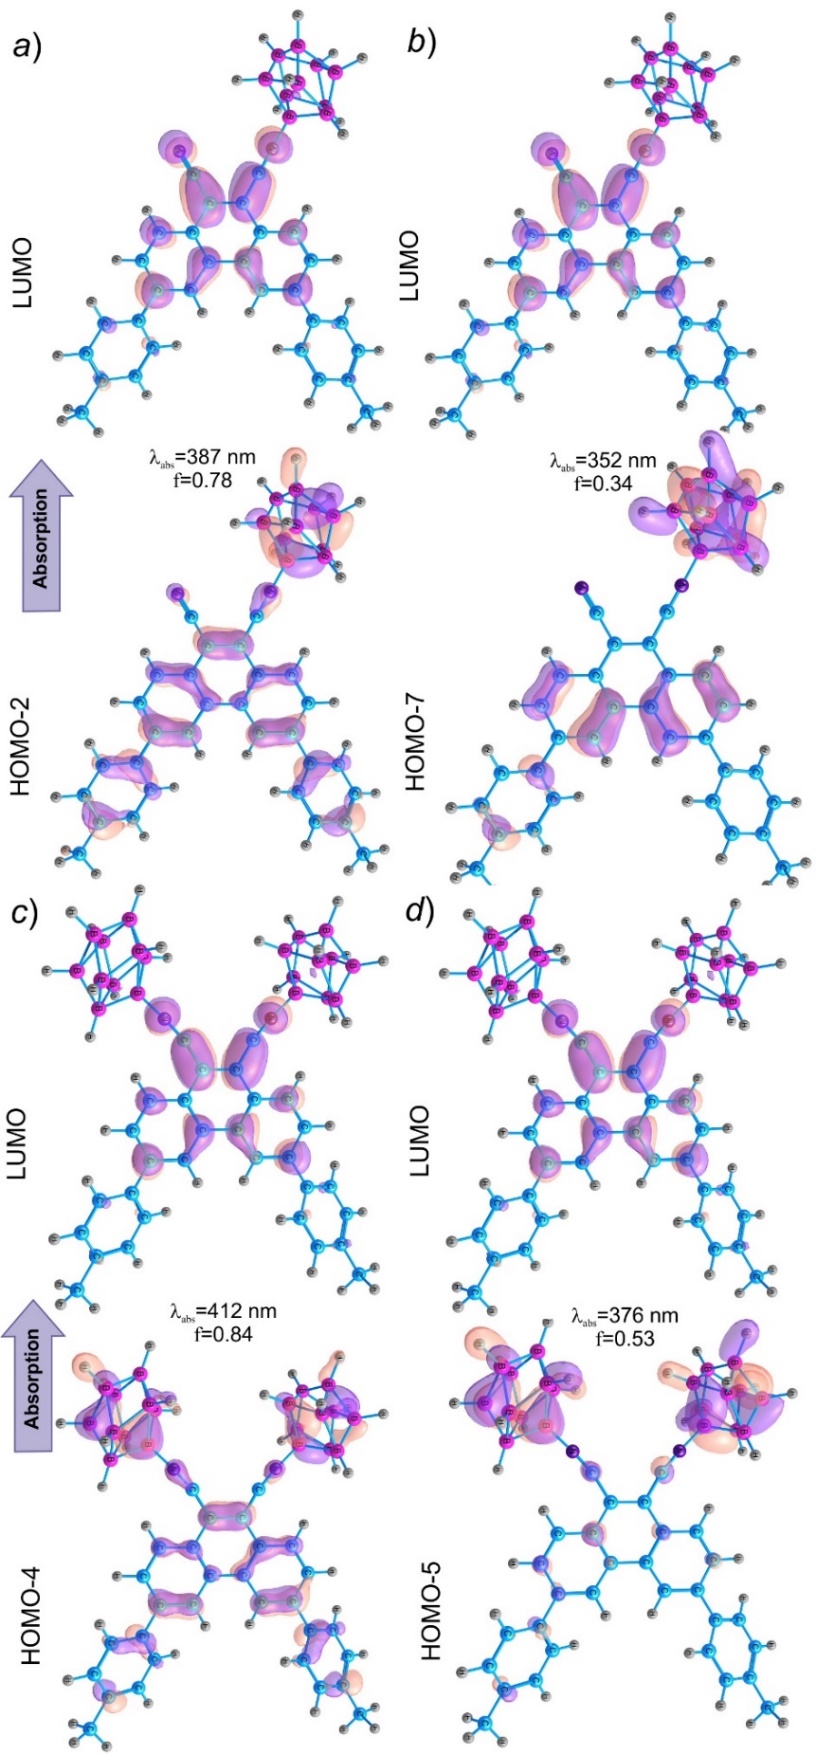


**Figure S9.** Molecular orbitals for the ground state of PFCN-B1 and PFCN-B2. a) Molecular orbitals for the S0→S1 transition of PFCN-B1; b) Molecular orbitals for the S0→S2 transition of PFCN-B1; c) Molecular orbitals for the S0→S1 transition of PFCN-B2; d) Molecular orbitals for the S0→S2 transition of PFCN-B2.


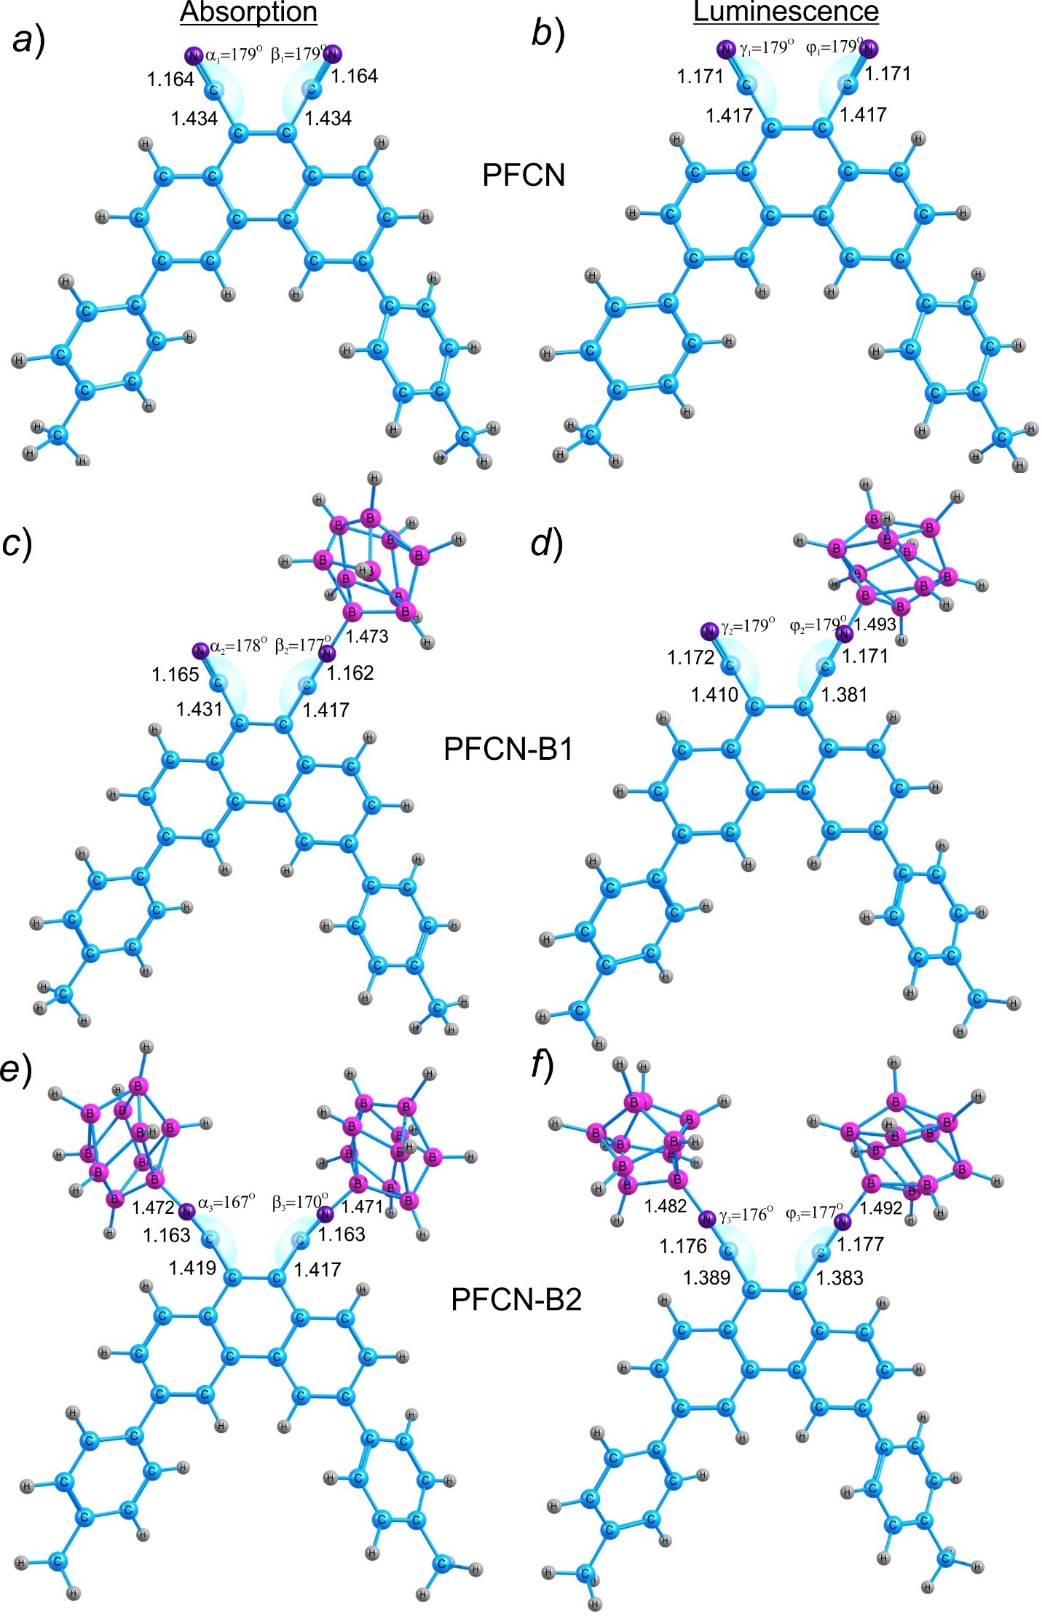


**Figure S10.** Atomic structure of the calculated molecules in the ground and excited states. Bond lengths (Å) and angles characterizing the change in spatial structure upon introduction of the boron cluster (B10H9-) in the ground and excited states for different phenanthrene compounds. a) PFCN geometry in the ground state; b) PFCN geometry in the excited state; c) PFCN-B1 geometry in the ground state; d) PFCN-B1 geometry in the excited state; e) PFCN-B2 geometry in the ground state; f) PFCN-B2 geometry in the excited state.

References

1. Yakimanskiy, A.A.; Kaskevich, K.I.; Zhukova, E. V.; Berezin, I.A.; Litvinova, L.S.; Chulkova, T.G.; Lypenko, D.A.; Dmitriev, A. V.; Pozin, S.I.; Nekrasova, N. V.; et al. Synthesis, Photo- and Electroluminescence of New Polyfluorene Copolymers Containing Dicyanostilbene and 9,10-Dicyanophenanthrene in the Main Chain. *Materials (Basel).* **2023**, *16*, 1–15, doi:10.3390/ma16165592.
